# Supplementary material for: Exploiting radar polarimetry for nowcasting thunderstorm hazards using deep learning
Source: Copernicus journal article supplement (doi:10.5194/egusphere-2023-551), 2023-05-11
Supplement: Supplementary file [file egusphere-2023-551-AC2-supplement.pdf]

Dear reviewer,

Thank you for your time in providing feedback and suggestions for our manuscript “Exploiting radar polarimetry for nowcasting thunderstorm hazards using deep learning”. Below, we provide our responses to the comments of the reviewer.

The Reviewer’s original comments are noted below in *green italics*. Our responses are given below each comment in normal font.

Best wishes,

Authors

**Minor revisions:**

*Some parts of the paper are difficult to understand without consulting the papers by Leinonen et al. (2002a, b, 2023). Of course, it is not useful to repeat all the details from those studies, but including the essentials would be very helpful for the reader.*

We included a new subsection about how the data is selected and split in a training, test and validation set (see 3.1 *event selection*). In subsection 3.2 *Neural Network* we provided more information about the learning rate, stopping criterion, and the computational performance.

*Abstract: The first five sentences are more of an introduction than an abstract; consider shortening this part and adding some more details about your specific work.*

We shortened it by removing the introductory part and wrote some more detail about the specific work.

*L18-19: NWP models are useful not only for stratiform precipitation, but also for convection. In particular, high-resolution EPS and rapidly updated cycle (RUC) models are quite good at predicting convection.*

Due to the high computational demand, it takes several tens of minutes to have the results of the NWP models available (e.g. COSMO-1E runs requires 50 min runtime). While the NWP models are quite good in predicting convection, the results are not available within tens of minutes, limiting the usefulness in the ~1<sup>st</sup> hour. We rewrote this paragraph (see introduction, 2<sup>nd</sup> paragraph), to explain this better.

*P1, last paragraph: It is unclear what is meant by “These models...are not available in real time.” Besides, the general statements about NWP models do not hold true for RUC)and ensembles EPS forecasts.*

Based on this, and the feedback of the other reviewer, we reformulated this paragraph (see introduction, 2<sup>nd</sup> paragraph).

*L54: but also heavy rainfall? Figure 2 shows the result for nowcasting precipitation based on dual-pol variables.*

We wanted to point out that the novelty of our study is that we incorporate polarimetry also for nowcasting lightning and hail, and not only on heavy rainfall (which is also already done in the research from Pan et al. (2021)). But this is indeed not very clearly written, so we changed the sentence into: *“In addition, we investigate the potential to nowcast not only precipitation, but also hail and lightning, by utilizing polarimetric variables.”*

*Introduction: Can you describe the objectives of your study in more details? Only one sentence (L48) is too short.*

We specified that we do a data source analysis, both by performing a qualitative and quantitative analysis: *“Data source importance is explored by performing both a qualitative and quantitative analysis (i.e. focal loss or cross entropy, Shapley values, critical success index and fractions skill score).”*

*First paragraph of Section 2: A period of 5 months is very short. The affiliation of the authors suggests that they have direct access to the data. So why didn't you consider a longer period? In any case, at least in the conclusions I would expect a discussion of the reliability of the results given the short time period. Finally, please state the training period of the model and at least briefly state the data used for the model.*

We agree that using 6 months is on the shorter end. We wanted to make the results comparable with the results from the research from Leinonen et al. (2023), that is why we decided to use the same dataset. Despite the somehow short period, the dataset for training, testing and validation has a respectable size of around a million samples (not including the further diversity added by data augmentation).

We included a section about how the total training samples, how events are selected and split up in a training, test and validation set (section 3.1 event selection).

We added a small discussion at the end of the discussion section:

*“The machine learning model learned from a dataset that was limited to one convective season. Nevertheless, the training dataset contained around a million samples. In this paper, we chose to use the same period as Leinonen et al. (2023) to make the results comparable. By providing a dataset covering more convective seasons, it is expected that skill scores of the different model versions will improve. It is not expected that the ranking of different model versions with different input dataset will change, as more events will be available for all observation types (lightning, single polarimetric radar and polarimetric moments).”*

*L64 and Figures 1, 2: “...maximum range of observations is 246 km...” is unclear. Do you mean the study area (shown in Figures 1 and 2)? Where is the location? But why didn't you use the whole radar range? You should also explain that your study area is different from the one used by Leinonen et al. (2022). Perhaps an additional figure would help.*

We changed it to: *“The maximum observation range of a single radar is 246km”*. We also wrote down the size of the study area, to make it more clear. This is the same study area used by Leinonen et al. (2022).

*L105: Where does the 8 km distance come from? Have you performed sensitivity tests with variable distance?*

This definition is used in safety procedures at airports for takeoff and landing operations, and based on the regulations of the European Union (2017) and the International Civil Aviation Organization (2018). Hence, the choice was made to make the results of the nowcasting directly useful for this purpose. We did not perform sensitivity tests with variable distance; however, as the model is very flexible, it is very easy to change this distance and retrain it.

*L112: The classes for precipitation totals are rather coarse. Can you comment on this?*

The classes for precipitation are based on the warning levels used at MeteoSwiss. We performed an analysis with more classes for precipitation. However, this analysis showed that the skill of the model for the higher classes (corresponding to more extreme precipitation) became worse when more classes were included in total. As we focus on thunderstorm hazards, we decided to continue with the model that performed better for the more extreme cases (thus the model with only 3 classes). We added a small explanation in the text.

*Section 3.1: Could you add some more (mathematical + theoretical) details of the model used, so that a reader not familiar with CNN can get the gist?*

We included a short explanation of the purpose of the recurrent and convolutional layers and the encoder-forecaster framework: *“The recurrent connections enable to model the temporal evolution, while the convolutional connections model the spatial structure. This model has an encoder-forecaster framework, in which the encoder produces a deep representation of the atmospheric state, which is decoded into a prediction by the forecaster.”*

*Section 3.2: For the interpretation of the Tables and because the Shapley score is not well known, it would be very helpful to give the range of values and their interpretation.*

We included a sentence about the interpretation of the values: *“We normalize the sum of the values of the individual components to add up to 1, with higher values indicating higher importance.”*

*L138: A threshold of 50% for POH makes sense, but it would be very interesting to see how the results would change if the probability were higher (note that several studies have found a POD of ~30% for a POH of 50%, which means that POH = 50% means <40% really hail on the ground).*

There is no straightforward choice for a threshold to convert POH into hail event. E.g. car insurance loss data have verified a threshold of  $POH \geq 80\%$  to indicate the presence of hail locally (Nisi et al., 2016; Madonna et al., 2018) for severe hail events, which is also used for the definition of hail days in the Swiss hail climatology, see <https://www.meteoswiss.admin.ch/climate/the-climate-of-switzerland/hail-climatology.html>. The qualitative results are expected to be the same. Hence, we chose the threshold of 50% which is the most obvious by the mathematical definition.

We calculated the CSI again for POH, but instead for  $POH \geq 30\%$  and  $POH \geq 80\%$ . The skill of the model improves when smaller POH thresholds are selected to convert it into a hail event (that is,  $POH \geq 30\%$  gives the highest skill). These results are now shown in Table 3.

*Figures 1 and 2: Please insert the units of the color bars; it does not make sense to show ZDR in logarithmic units (values can also be negative)*

We changed both figure 1 and 2, inserted the units of the different input data used. In addition, we changed to color scale of ZDR, making negative values visible.

*L183: It's very interesting that the skill for heavy rain is increased when using polarimetric parameters, but not for hail. Are there any meteorological reasons for that (you may speculate a bit)?*

Very recent research from Martin Aregger (not yet published) indicated that ZDR columns coincides more with crowdsourced data than POH. ZDR columns are often associated with the updrafts in deep moist convective storms (Kumjian et al., (2014)), and are used as a predictive tool for hail growth and may help for nowcasting where hail falls. This indicates that POH is maybe not the best ground truth for hail. Unfortunately, these ZDR columns are not yet in our database, and for that reason, we couldn't use that as a ground truth. Besides, the POH observations - used as reference - might be less precise in comparison to precipitation and lightning observations, due to the retrieval method of the POH as hail retrieval is a parametrization based on the vertical extent of the updraft core.

We added a paragraph at the end of 4.2 discussion these arguments.

*Section 4.3. Again, I miss some interpretation of the results (try to give answers or speculate about the why of the results).*

We added some interpretation of the results:

*"A reason for the larger spread of the hail results might be the indirect retrieval method of the POH. While the precipitation radar and lightning sensors are designed for a direct observation of precipitation and lightning, the hail retrieval is a parametrization based on the vertical extent of the updraft core, i.e. a macroscopic property of the storm. Therefore, the POH observations - used as reference - might be less precise in comparison to precipitation and lightning observations, and, in consequence, could cause higher variation of the training performance.*

*As a final remark, the performance of a machine learning algorithm does not always improve when adding more predictors. In case of highly correlated or redundant predictors, no additional information content is added. However, a larger number of weights must be trained, which typically requires a larger training dataset. Furthermore, a more complex algorithm is more prone to overfitting."*

*"The machine learning model learned from a dataset that was limited to one convective season. Nevertheless, the training dataset contained around a million samples. In this paper, we chose to use the same period as Leinonen et al. 2023 to make the results comparable. By providing a dataset covering more convective seasons, it is expected that skill scores of the different model versions will improve. It is not expected that the ranking of different model versions with different input dataset will change, as more events will be available for all observation types (lightning, single polarimetric radar and polarimetric moments)."*

*L200: Can you specify the different thresholds considered here?*

We mean the probability thresholds here, so we wrote “probability thresholds”.

*L209: “...time and space scales of the target variables” not sure on this. Lightning and hail have smaller spatial and temporal scales compared to precipitation. So I would expect a higher skill for precipitation compared to the other two.*

It is difficult to compare these scores. For lightning we use a larger range and period (8km, within the last 10min). Hail and lightning are forecasted with timesteps of 5 min, while for heavy precipitation a longer accumulation time is selected (1hour). Besides, the classes selected of precipitation are on the tail of the distribution, making it also harder to predict.

*Conclusions: This section is rather short. Consider expanding it with more substance.*

We expanded this section, wrote some more details about the method and interpretation of the results and divided it into multiple paragraphs.

#### **Questions/Edits/Typos:**

*L13: Not the convective storms can turn into flash floods, but the associated heavy rainfall*

We changed this into: “The heavy rainfall associated with these convective storms can turn into...”

*L15: reformulate “...by these weather phenomena”; in this sentence, these refers to flash floods (object of the last sentence); but as you know, hail in Switzerland causes the largest economic losses.*

We changed it into: “...are caused by severe weather”

*L20 “...time results...” delete results*

The comma was by misplaced, and it is now corrected to: “Furthermore, due to high demand in computation time, results are not available in real time”

*L21: NWP models*

Changed to NWP models

*L24-25: nowcasting is simply warning or immediate rather than early warning*

We removed “early” from this sentence

*L31: “...to take the life cycle of convective cells with growth and dissipation ...”*

Corrected

*L44 and others: the term “hazard” represents the potential for harm of a certain phenomena. As this is unclear in your manuscript (no information about hail size, rain intensity), I would suggest to replace “hazard” by “phenomena” when used in conjunction with hail or precip.*

We think that the use of the word “hazard” is justified here since we focus on predicting

phenomena that have the potential to cause harm. Of our three targets, lightning is always potentially hazardous, and we specialize our model to predict heavy precipitation, which causes flash floods and landslides. Admittedly, we do not consider hail size in the models of this study, but in several studies POH values of 80% or above are used as an indicator for severe hail. Hail is also an indication of strong convective storms itself that are inherently hazardous.

*L48: delete will*

We removed “will” from this sentence, and changed it into: “... this research investigates ...”

*L49: specify “model” e.g., convolutional neuronal network model*

We specified that it is a recurrent-convolutional deep learning model

*L53: I doubt whether you really retrieve relevant information about microphysics; from the dual-pol radar you can get information about hydrometeors and their characteristics and not about physics (o.k., the latter could be true, but requires complex post-processing which is not mentioned in the paper)*

We replaced “microphysics” with “hydrometeors and their characteristics”

*L59 and others: be consistent in the use of “data”: either singular or plural, but do not mix.*

We changed it to plural where it was appropriate.

*L71: I would be more specific here as weather radar observations may also include polarimetric variables*

We included which specific variables are part of this data source. Besides we also included the following sentence to make clear that dual-pol data is used in the data chain (for clutter suppression): “Note that dual-pol data is used for clutter suppression in the processing chain of the Swiss operational weather radar network.”

*L73: is maximum echo maximum reflectivity? And what is meant by maximum, CAPPI or the maximum in overlapping areas?*

We specified more explicitly which variables are used in the data source of radar, to make more clear what is used. The “maximum” refers to the maximum value in the vertical column.

*L87: either use (plural) or used*

Changed to used

*Eq 1: Check the dimensions of the equation. Are VIS and w dimensionless?*

We included the dimensions of the different parameters. Visibility (VIS) is in % and  $\beta$  is in  $\text{m}^{-1}$ , so the unit of h (height above the ground level in m) is cancelled out by beta, resulting in a dimensionless w.

*L92: what is “slope of the exponential”?*

We changed the into this, it is referring to the slope of the exponent in that equation.

*L120: I suggest to refer here directly to the target values lightning, POH, and CombiPrecip*

We wrote down lightning and POH but kept heavy precipitation, because CombiPrecip provides a quantitative precipitation estimation, but we are not exactly predicting CombiPrecip. Our target is derived from CombiPrecip.

*L130: again, what are training and application period?*

The whole dataset was grouped to days, and the days were randomly assigned to training, test and validation sets. We included a section (3.1 event selection) about how the data is selected and split up in a training, test and validation dataset.

*L137: "ground truth" for hail is weird given the fact that POH is obtained from an integral bulk (reflectivity) only, measured aloft, and does not consider horizontal drifting between the height of the radar signal and the ground*

We replaced "ground truth" with "target variables"

*L146: "...is an imbalance..."*

Corrected

*Figures 1/2: can you write a few words about the weather situation on that day? Please indicated the date.*

We added both the dates and the meteorological context in this section.

*Figure 3: A continuous color scheme for the colorbar makes no sense here.*

We changed the color scale of the figure, to make the differences between the values more evident.

*L202: "...lead times the skill of the..." "...while for hail the values drop..."*

Added "the" in both sentences

*L205: indicats; nowcast --> predict*

Changed to indicates and predict

*L209: "...than for lightning..."*

Changed

*L2010: Reference not in brackets*

Corrected

*L2012: lightning (plural does not exist); PR, AUC, and CSI*

Changed lightning to lightning. We meant the area under the curve from the precision recall plot (not two separate things).

L216: "...while for hail it we find..." delete "it"  
"it" is removed
